**Title:** Global climate changes will lead to regionally divergent trajectories for ectomycorrhizal communities in North American Pinaceae forests

**Running Head:** Climate change and ectomycorrhizal diversity

Brian S. Steidinger [1], Jennifer M. Bhatnagar [2], Rytas Vilgalys [3], John W. Taylor [4], Thomas D. Bruns [5], Kabir G. Peay\* [6]

1. Department of Biology, Stanford University (lab of origin); bsteidi2@stanford.edu
2. Department of Biology, Boston University; jmtalbot@bu.edu
3. Department of Biology, Duke University; fungi@duke.edu
4. Department of Biology, University of California Berkeley; jtaylor@berkeley.edu
5. Department of Biology, University of California Berkeley; pogon@berkeley.edu
6. Department of Biology, Stanford University; kpeay@stanford.edu; 227A Herrin Hall; (650) 723-0552

**keywords:** climate change, community composition, diversity-function relationship, ectomycorrhizal fungi, seasonality, soil enzymes

**Letter**

**Abstract: 150 words**

**Main Body: 5000 words**

**Tables: 1**

**Figures: 6**

1 **Abstract**

2

3 Ectomycorrhizal fungi (ECMF) are partners in a globally distributed tree symbiosis that  
4 enhanced ecosystem carbon (C)-sequestration and storage. However, resilience of ECMF to  
5 future climates is uncertain. We sampled ECMF across a broad climatic gradient in North  
6 America, modeled climatic drivers of diversity and community composition, and then forecast  
7 ECMF response to climate changes over the next 50 years. We predict ECMF richness will  
8 decline over nearly half of North American Pinaceae forests, with median species losses as high  
9 as 21%. Mitigation of greenhouse gas emissions can reduce these declines, but not prevent them.  
10 Warming of forests along the boreal-temperate ecotone results in projected ECMF species loss  
11 and declines in the relative abundance of C demanding, long-distance foraging ECMF species,  
12 but warming of eastern temperate forests has the opposite effect. Sites with more ECMF species  
13 had higher activities of nitrogen-mineralizing enzymes, suggesting that ECMF species-losses  
14 will compromise their associated ecosystem functions.

15

## 16 **Introduction**

17           Forecasting changes in the diversity and composition of microbial symbiont communities  
18 under anticipated future climates is valuable for concentrating conservation efforts(van der Linde  
19 *et al.* 2018) and predicting changes to ecosystem function (Bissett *et al.* 2013; Koide *et al.* 2014;  
20 Duffy *et al.* 2017). Loss of host species results in decreased ecosystem productivity and stability  
21 across a broad range of taxa (Duffy *et al.* 2017), including effects on microbes (Duffy *et al.*  
22 2017; Laforest-Lapointe *et al.* 2017). Recent advances in the molecular methods of measuring  
23 species richness and composition have made it possible to characterize current continental scale  
24 diversity patterns of soil microbes (Tedersoo *et al.* 2012a; Talbot *et al.* 2014; Tedersoo *et al.*  
25 2014; van der Linde *et al.* 2018). However, continental-scale forecasts under future climates are  
26 unavailable for most microbial guilds, making it difficult to predict the consequences of climate  
27 change to global biodiversity and ecosystem services. Here we predict how the species richness,  
28 relative abundance, and composition of ectomycorrhizal fungi (ECMF) in North American pine  
29 forests will change over the next 50 years.

30           ECMF are obligate plant symbionts that dominate global temperate and boreal forest soil  
31 communities and are implicated in most major ecosystem processes (Phillips *et al.* 2013). Two  
32 ECMF processes in particular may enhance how ecosystems will buffer the atmosphere against  
33 increased CO<sub>2</sub> emissions: (1) the C-fertilization effect, where ECMF increase forest productivity  
34 and nutrient mobilization in response to increased atmospheric CO<sub>2</sub> (Terrer *et al.* 2016); and (2)  
35 the Gadgil effect, where ECMF inhibit decomposition by free-living soil microbes (Gadgil &  
36 Gadgil 1971; Averill & Hawkes 2016). Because these functions enhance ecosystem C-  
37 sequestration and –retention, respectively, they have the potential to buffer the planet against  
38 climate change by reducing CO<sub>2</sub>-associated radiative forcing.

39           The ability of ECMF to acquire soil organic nitrogen (N) is hypothesized to mediate C-  
40 fertilization and the Gadgil effect. ECMF produce extracellular proteolytic and oxidative  
41 enzymes that liberate N from organic complexes. When ECMF transfer this N to their host trees  
42 under elevated CO<sub>2</sub>, it can fuel increased photosynthetic rates (Terrer *et al.* 2016). Similarly, by  
43 liberating N from organic complexes, ECMF are hypothesized to competitively inhibit free-  
44 living soil microbes that require N to decompose and respire soil organic matter (Averill *et al.*  
45 2014). If ECMF-associated enzyme activity is dependent on the diversity and composition of  
46 ECMF communities (Talbot *et al.* 2013), then diversity losses and shifts in composition have the  
47 potential to compromise ECMF-associated C-sequestration and –retention.

48           Ecosystem services are also likely affected by shifts in the relative abundance of ECMF  
49 relative to other fungal guilds (inclusive of saprotrophs and pathogens) (Averill & Hawkes  
50 2016), and also to shifts in the abundances of different nutrient foraging strategies within ECMF.  
51 Relative to short-distance hyphal exploration strategies, long distance foraging ECMF are  
52 associated with higher activities of organic N mineralizing enzymes (Hobbie & Agerer 2010;  
53 Tedersoo *et al.* 2012c) and potentially also relatively higher demands for host C (Agerer 2001;  
54 Deslippe *et al.* 2011; Fernandez *et al.* 2017). Thus, reducing the abundance of long- relative to  
55 short-distance foraging ECMF may result in declines in C-allocation belowground and the fungal  
56 N-mineralization hypothesized to drive the C-fertilization and Gadgil-effects.

57           Climate change can alter the community composition of ECMF by pushing fungi (Kipfer  
58 *et al.* 2010) or their host plants (Fernandez *et al.* 2017) outside their ranges of physiological  
59 tolerance (Pickles *et al.* 2012). However, most studies to date that have examined ECMF or  
60 whole fungal community responses to simulated climate change have found fairly small effects  
61 (Parrent *et al.* 2006; Tu *et al.* 2015; Fernandez *et al.* 2017; Mucha *et al.* 2018) relative to natural

62 changes in fungal communities observed along large natural gradients of temperature and  
63 precipitation (Jarvis *et al.* 2013; Talbot *et al.* 2014; Tedersoo *et al.* 2014; Nottingham *et al.* 2016;  
64 Peay *et al.* 2017). Yet, few datasets currently exist with spatial resolution necessary to make  
65 accurate predictions of ECMF response to climate change across relevant geographic regions  
66 (Mohan *et al.* 2014).

67 To obtain the data needed to determine how ECMF communities are likely to change in  
68 altered climates, we used next-generation DNA sequencing to determine the species composition  
69 of ECMF in a series of 68 sites, each consisting of 26 soil samples taken with a consistent  
70 sampling design within a 40 x 40 m plot, spread across different EPA climatic regions in North  
71 America (Omernik & Griffith 2014) (Figure 1a). To isolate the effect of climate on ECMF  
72 communities while minimizing the known effects of vegetation biome type variation on  
73 microbial community structure and function (Fierer *et al.* 2012; Tedersoo *et al.* 2012b), we  
74 placed all of our sites in forests dominated by single species of tree from the family Pinaceae (an  
75 obligate ECMF host lineage).

76 Recent historical climates (30-year means) influence soil nutrient availability and  
77 constrain the composition and function of ecosystems in ways that govern their response to  
78 changing climates (Karhu *et al.* 2014; Hawkes *et al.* 2017). To determine how historical climate  
79 (1960-1990) structures ECMF communities in our sites, we fit non-linear models to the  
80 relationships between ECMF species richness, relative abundance, and community dissimilarity  
81 and climate, in situ measurement of local soil chemistry, global rasters of soil chemical  
82 characteristics, and estimated total N-deposition. Using model selection criteria that maximize  
83 performance relative to model complexity, we eliminated all but climatic predictors from our  
84 models. Additionally, to identify ECMF community thresholds to changes along temperature

85 gradients, we performed threshold indicator taxa analysis (Baker & King 2010). We then used  
86 our statistical models fit with 30-year climate means to forecast ECMF community changes  
87 under future (2070) climates, both with and without mitigations in greenhouse gas emissions. We  
88 inferred potential functional consequences of declines in ECMF diversity by comparing ECMF  
89 species richness to the activity of soil enzymes associated with hydrolysis and oxidation of  
90 organic substrates.

## 91 **Materials & Methods**

### 92 *Sampling*

93 We sampled 68 sites across North America by focusing on forests dominated by a single plant  
94 family, the Pinaceae (Table S1). The Pinaceae are ideal for exploring environment-community-  
95 function relationships across Kingdom Fungi because they have a broad distribution across North  
96 America and show low levels of host specificity for mycorrhizal fungi within the family (Rusca  
97 *et al.* 2006; Ishida *et al.* 2007). For example, North American pines readily associate with  
98 European ectomycorrhizal fungi (Vellinga *et al.* 2009) and co-occurring Pinaceae and  
99 angiosperms often share most common ectomycorrhizal fungi (Kennedy *et al.* 2003). Plots  
100 spread across North America were chosen with the help of local experts to find mature stands  
101 with high dominance of a single Pinaceae species (Fig. S1).

102         Sampling was carried out in 2011 and 2012 near the period of peak plant biomass  
103 production for a given region. In each plot, 13 soil cores were collected from a 40 m x 40 m grid  
104 (Fig. S1). To look at spatial turnover of community and function at the local to landscape scales,  
105 we ensured that each plot had at least one other plot located within a 1-50 km range (Fig. S1B).  
106 At each point in the plot, fresh litter was removed and a 14 cm deep, 7.6 cm diameter soil core  
107 was taken and immediately separated into a humic (O) horizon and mineral (A) horizon. This

108 resulted in a total of 26 soil samples collected per plot (13 sample points x 2 horizons). After  
109 removal, soils were kept on ice until processed. Soils were sieved through a 2 mm mesh to  
110 remove roots and rocks and homogenized by hand. A ~0.15-0.25g subsample was placed directly  
111 into a bead tube from the Powersoil DNA Extraction Kit (MoBio, Carlsbad, CA USA), and the  
112 samples were stored at 4°C until DNA extraction. Before extraction, samples were homogenized  
113 for 30 seconds at 75% power using a Mini-Beadbeater (BioSpec, Bartlesville, OK USA). A  
114 second subset of soil core x horizon samples were stored in -80 C freezer (within 48 hours of  
115 collection) for soil chemical analysis.

#### 116 *Soil Chemistry*

117 Frozen soils were thawed and analyzed for pH in a 1:1 water ratio using a glass electrode. Total  
118 extractable ammonium and nitrate concentrations were analyzed in 2.0 M potassium chloride  
119 extracts of each soil sample using a WestCo SmartChem 200 discrete analyzer at Stanford  
120 University. For site-level values, we took the average of all soil cores processed for each site.  
121 Soil chemical variables were included in statistical models but later dropped during model  
122 selection (see Statistical Analysis and Supplemental Materials).

#### 123 *Enzyme Assays*

124 We assayed the potential activities of six extracellular enzymes involved in soil carbon and  
125 nutrient cycling (using methods described in (Talbot *et al.* 2014): B-glucosidase (BG, which  
126 hydrolyzes cellobiose into glucose), polyphenol oxidase (PPO, which oxidizes phenols),  
127 peroxidase (PER, including oxidases that degrade lignin), acid phosphatase (AP, which releases  
128 inorganic phosphate from organic matter), N-acetylglucosaminidase (NAG, which breaks down  
129 chitin), and leucin-aminopeptidase (LAP, which breaks down polypeptides). Potential enzyme

130 activities in bulk soil were measured separately for individual organic and mineral horizon  
131 samples using fluorometric and colorimetric procedures (German *et al.* 2011) on a microplate  
132 reader (n=253).

### 133 *Molecular Methods*

134 To characterize fungal communities we sequenced the internal transcribed spacer (ITS) region of  
135 the nuclear ribosomal RNA genes, the official barcode of life for fungi (Schoch *et al.* 2012).  
136 Because of improvements in technology during the course of this project, soil samples were  
137 sequenced using two different platforms. Soil samples from twenty-five sites were sequenced via  
138 454 pyrosequencing as per Talbot *et al.* 2014. The remaining 43 sites were sequenced on an  
139 Illumina MiSeq at the Stanford Functional Genomics Facility using the primer constructs and  
140 protocols from (Smith & Peay 2014). Using a common set of soil samples from this study  
141 sequenced on both platforms we have previously demonstrated that both richness and species  
142 composition are highly reproducible and strongly correlated between the two platforms (Smith &  
143 Peay 2014) so that combining samples should not cause any bias in our analyses.

144

### 145 *Bioinformatics*

146 Samples sequenced on the 454 platform were cleaned and denoised in QIIME (Caporaso *et al.*  
147 2010) (Reeder & Knight 2010), after which we extracted the ITS1 region (Nilsson *et al.* 2010).  
148 For samples sequenced on the Illumina platform, samples were first trimmed using Cutadapt  
149 (Martin 2011) and Trimmomatic (Bolger *et al.* 2014), and then merged using USEARCH (Edgar  
150 2010). At this point cleaned 454 and Illumina sequences were merged into a single FASTA file,  
151 where sequences were dereplicated, clustered into species level operational taxonomic units  
152 (OTUs) at 97% sequence similarity using USEARCH. We removed all singletons and chimeras,



153 and dropped occurrences <0.025% of relative sequence abundance within a sample to account  
154 for tag-swapping (Carlsen *et al.* 2012). We took a two-step approach to assigning taxonomic  
155 identity, first using the BLAST tool with the UNITE reference database (Koljalg *et al.* 2013) to  
156 eliminate potentially non-fungal taxa; and next using the naïve Bayesian classifier from the  
157 Ribosomal Database Project (RDP) (Wang *et al.* 2007) along with the Warcup ITS reference set  
158 (Deshpande *et al.* 2016) to assign taxonomy. OTUs with sufficiently confident taxonomic  
159 assignments were then matched to functional guilds using the FUNGUILD database (Nguyen *et*  
160 *al.* 2016). The relative abundance of ECMF exploration strategies (% of ECMF OTUs) were  
161 assigned by matching ECMF genera against published lists (Agerer 2006; Tedersoo & Smith  
162 2013), which are available online ([www.deemy.de](http://www.deemy.de)). Strategies were assigned to the following  
163 categories according to (Fernandez *et al.* 2017): contact short (CS), contact medium (CM), and  
164 medium long (ML). Full description of the bioinformatic methods are available in the online  
165 supplement.

166

### 167 *Statistical Analyses*

168 To correct for variability in DNA sequencing depth between samples from the two sequencing  
169 platforms, we rarefied our sequences to an even-depth of 17,273 sequences. The even-depth was  
170 determined after aggregating samples to their respective sites. To determine the relative  
171 abundance of ECMF sequences relative to all fungal sequences, we also summed the total  
172 number of ECMF sequences and divided it by the sum of all fungal sequences.

173         Recent-historical climates (30 year means) are commonly used to model the bioclimatic  
174 variables that shape current species distributions and responses to climate change (Hijmans &  
175 Graham 2006). To determine the role of climate in shaping the current and future distributions of

176 ECMF species richness and community composition, we downloaded the following 30 year  
177 mean (1960-1990) and projected future (2070) bioclimatic variables from World Clim version  
178 1.4 (Hijmans *et al.* 2005): mean annual temperature (°C), temperature seasonality (standard  
179 deviation of monthly temperatures), mean annual precipitation (mm), and seasonality of  
180 precipitation (coefficient of variation in monthly precipitation). These variables capture both the  
181 range and central tendency of climate factors that are demonstrated to affect fungal communities  
182 and exhibit low co-linearity (variance inflation factor < 3), which minimizes spurious fits  
183 between predictor and response variables. We extracted data for our 68 sites from these climate  
184 rasters.

185 We fit generalized additive models (GAMs) of the ECMF species richness, relative  
186 abundance (out of all fungi), and relative abundance of CS, CM, and ML exploration strategies  
187 of each site as a function of the bioclimatic variables using the *mgcv* package in R (Figure S7).  
188 We choose to use non-parametric GAMs, rather than linear models, so that our statistical models  
189 would have sufficient flexibility to capture curvilinear responses of EMCF diversity and  
190 abundance to environmental factors. However, a potential drawback of this approach is the  
191 potential to over-fit data, predicting environmental responses that are difficult to interpret  
192 biologically. In order to navigate these twin pitfalls, we constrained our model fits to four knots  
193 to allow for threshold, saturating, uni- and bi-modal responses to environmental variables.

194 In addition to the four climatic variables for which we have recent-historical and  
195 projected 2070 data, we also considered GAMs with only *in situ* soil predictors (soil pH, NH<sub>4</sub>-  
196 N), only soil predictors from global rasters of surface horizon chemistry [soil pH in KCl (Hengl  
197 *et al.* 2017) and total N density (Task 2000)], only estimates of total atmospheric N-deposition  
198 (Hember 2018), and combinations of climate with soil *in situ*, soil raster, and N-deposition

199 predictors. We selected our climate-only model based on its superior performance relative to  
200 model-complexity according to the generalized cross validation (GCV) statistic (full details in  
201 Supplementary Materials). In contrast with soil data, climate variables are also available across  
202 North American pine forests for both recent-historical and projected future scenarios (contingent  
203 on anthropogenic greenhouse emissions), allowing us to predict and project ECMF species  
204 richness, abundance, and community composition across time and space.

205         We used our statistical models to generate predictions over North America, under both  
206 historical and future climate conditions. We constrained our predictions to the spatial extent of  
207 the distributions of the twelve most abundant pine tree species from our plots. Tree species  
208 distributions were derived from the United States Geological Survey (USGS) shapefiles, which  
209 we dissolved into one composite range using the “raster” package in R. To summarize our results  
210 by region, we subset our predictions according to EPA vegetation zones (Omernik & Griffith  
211 2014). In Figure 1ab, the EcoRegions temperate sierras, semi arid highlands, and tropical dry  
212 forests were combined into the composite Ecoregion “S. Sierras.” This was done due to the  
213 similar climate of the small areas of the constituent regions that overlap with the distribution of  
214 pine-forests.

215         To project our statistical models to future climates (the year 2070), we downloaded  
216 predicted climate rasters from 17 different global climate models (GCMs) that have been  
217 incorporated into the Coupled Model Intercomparison Project Phase 5 (CMIP5) (Table S5).  
218 While these 17 GCMs differ in complexity, each simulates anthropogenic changes using two  
219 greenhouse emission scenarios, corresponding to Relative Concentration Pathways (RCP) of 4.5  
220 and 8.5 (Allen *et al.* 2014). In order to offset prediction-errors associated with individual GCMs  
221 (e.g., (Pierce *et al.* 2009), we projected ECMF species richness, relative abundances, and

222 composition using a consensus-GCM, which is the average predicted climate for each pixel  
223 across all 17 GCMs. To plot the percent change in species richness, we took the predicted  
224  $[(\text{future richness} - \text{historical richness})/(\text{historical richness})]$ .

225         In order to analyze ECMF community composition, we first transformed our OTU table  
226 into a table of the proportion of sequences represented by each species at our sites. We then  
227 derived a Bray-Curtis dissimilarity matrix for each pair of sites. The relationship between  
228 geographic distance and difference in climate predictors of each site was analyzed using  
229 generalized dissimilarity models (GDM) using the package “gdm” in R (Manion *et al.*). We used  
230 the fitted GDM model to project the change in dissimilarity among forest sites in historical vs.  
231 projected climates. For the future climate, we scaled the first PC axes of predicted community  
232 composition from 0-255 and plotted the points using three dimensional color scaling [PCA 1  
233 (green), PCA 2 (red), PCA 3 (blue)].

234         In order to identify responses of individual ECMF taxa to changes in temperature  
235 gradients, we performed Threshold Indicator Taxa ANalysis (TITAN) using the “TITAN2”  
236 package in R (Baker & King 2010). First, we aggregated our OTU table to the level of assigned  
237 species name and removed all species that occurred in fewer than 4 sites. Next, we used TITAN  
238 to find the individual ECMF species responses to gradients of mean annual temperature, which  
239 our analyses identified as having two different ECMF-diversity optima. The analysis returns two  
240 metrics for each species: (1) a change point, which splits each species’ abundances into two  
241 classes along a environmental gradient (above and below a set temperature) in a way that  
242 maximizes the fidelity of species’ association for one of the two classes; and (2) a standardized  
243 z-score, where the magnitude is proportional to the sensitivity of the species to change and the  
244 sign indicates that the species’ increases or decreases in relative abundance when temperatures

245 exceed the change point (positive and negative z-scores, respectively). For plotting purposes, we  
246 display only pure and reliable indicator taxa [e.g., (van der Linde *et al.* 2018)], We identified the  
247 temperature thresholds for ECMF communities as the peaks in the cumulative distributions of  
248 the negative and positive-z values, respectively.

249 The mean activity of each enzyme in all cores (organic and mineral horizons) were  
250 calculated for each site and log-transformed. Because activity of individual enzymes were often  
251 correlated we express enzyme activity in terms of the first two axes from principal component  
252 analyses of activities across the 25 sites where enzyme activity was measured.

## 253 **Results**

254 Climate variables explained 58% of the deviance in ECM species richness (range 33-199  
255 species per plot), 41% of the deviance in ECMF relative abundance (7-78% of sequences), and  
256 41% of species composition (0.6-1 dissimilarity) among sites (Table 1). The most species-rich  
257 and relatively abundant ECMF communities are associated with sites with high seasonality in  
258 temperature and precipitation (Figure 2ab). Seasonality also explains the most variability in  
259 ECMF species composition, with the largest differences associated with differences in  
260 temperature seasonality (Figure 2c).

261 ECMF respond to historical climates differently by region. The most species-rich ECMF  
262 communities in the northern and northwest mountain forests are cold and dry (0°C and < 1 m  
263 mean annual temperature and precipitation, respectively). By contrast, the most species-rich  
264 ECMF communities in eastern temperate forests are hot and wet (> 12°C, >1 m precipitation,  
265 Figure 2a). Using general-additive models, which fit continuous, curvilinear responses along  
266 temperature gradients, we found a bimodal relationship between species richness and mean  
267 temperature, with separate cold- and hot-diversity optima (Figure 2a). As a result, our models

268 predict that warming decreases species richness in the relatively cold north/northwest forests and  
269 increases species richness in the eastern temperate forests.

270 Relative abundance and species richness of ECMF are correlated ( $R^2=0.23$ ,  $p<0.01$ ) and  
271 respond similarly to variability in climate (Figure 2ab). However, unlike ECMF species richness,  
272 ECMF relative abundance increases with temperature even in forests with mean annual  
273 temperatures  $< 12^\circ\text{C}$ . As a result, our statistical models predict partial increases in ECMF  
274 relative abundance with warming, although the net-effect is contingent on climate changes to  
275 precipitation and seasonality (Figure 2b).

276 Similar to our models of ECMF species richness, the relative abundance of long-distance  
277 foraging strategies increases with mean temperature in eastern temperate forests with mean  
278 annual temperatures  $> 12^\circ\text{C}$  and declines with mean temperature in southern boreal forests  
279 (Figure S7c). By contrast, both short and medium-distance foragers increase in relative  
280 abundance with temperature increases in the colder north / northwestern EcoRegions (Figure  
281 S7ab). As a result, our models predict that sites that lose species with increased temperatures  
282 should also decline in the abundance of long-distance foraging strategies.

283 Threshold indicator taxa analysis identifies ECMF species that reliably respond either  
284 negatively or positively to increases in mean annual temperature (Figure 3a). Based on the peaks  
285 of the cumulative distributions of the change points for ECMF species with negative and positive  
286 temperature associations (Figure 3b), we identify two ECMF-community thresholds: (1) a cold  
287 threshold at  $3^\circ\text{C}$ , which is associated with declines among threshold indicator species with  
288 negative z-scores; and (2), a hot threshold at  $12^\circ\text{C}$ , which is associated with increases among  
289 threshold indicator species with positive z-scores. Notably, these ECMF community thresholds

290 occur near the inflection points for the response of overall ECMF species richness to mean  
291 annual temperature (Figure 1a).

292 We compared model predictions using 30-year mean climates (1960-1990) to climate  
293 projections for 2070 both with and without mitigation in greenhouse gas emissions (RCP 4.5 and  
294 8.5, respectively). Our models predict that both ECMF diversity and the abundance of long-  
295 distance foragers decline at the temperate-boreal ecotone, which includes the southern extent of  
296 the northern forests, the northwest mountain forests, and the marine west coast forests (Figures  
297 1b,3, 6). By contrast, our models predict increases in ECMF species richness in  
298 south/southeastern forests, including the southern extent of the eastern temperate and temperate  
299 sierran forests of Northern Mexico (Figure 1a, Figure 4a). The projected shifts in community  
300 composition, which are independent from projected changes in species richness, are also more  
301 severe at the southern and western extent of the northern and northwest mountain forests and  
302 along the eastern temperate forests (Figure 4c). With mitigation in greenhouse gas emissions,  
303 median loss of species richness and the geographic extent of those declines shrink from 21 to  
304 14% and from 48 to 44% of pine forests, respectively. Species gains are also more extensive and  
305 intense with higher greenhouse-gas emissions (Figures 1b,4).

306 Sites differed in the soil activities of five different extra-cellular enzymes, which we  
307 represent with the first two axes of principal component analysis (explaining 56 and 21% of  
308 enzymatic variability, Figure 6a). All assayed enzymes load positively onto PC axis 1, while axis  
309 2 discriminates between oxidative (positive loading) and hydrolytic enzymes (negative loading,  
310 with the exception of leucine-aminopeptidase). Both total and oxidative enzyme activity are  
311 correlated with ECMF species richness using single regression (Figure 6bc), but the relationship  
312 is statistically significant only for oxidative enzymes ( $R^2=0.17$ ,  $p=0.04$ ).

313

314 **Discussion**

315         With no mitigations in greenhouse gas emissions, we predict that as many as 48% of  
316 North American pine forests will lose 21% of their ECMF species due to climate changes in the  
317 next 50 years. Predicted declines in ECMF diversity are associated with the temperate-boreal  
318 ecotone, which is already vulnerable to global change due to warming-associated declines in  
319 growth and photosynthetic rates of southern boreal trees (Reich & Oleksyn 2008). Our  
320 predictions are generated using a model of historical climate on current ECMF diversity and  
321 composition that yields two key findings: (1) continental diversity patterns of ECMF in Pinaceae  
322 forests are driven primarily by differences in temperature and precipitation seasonality and (2)  
323 the ECMF diversity of a forest can either increase or decrease with mean annual temperature,  
324 contingent on its association with cold- or hot- diversity optima.

325         Our models explain a substantial fraction of variability in ECMF diversity and  
326 community structure using climate only, with soil N-availability and anthropogenic N-deposition  
327 being dropped as predictors during model selection due to their low predictive power relative to  
328 model-complexity (Supplementary Materials). This negative result with respect to N-deposition  
329 contrasts with some regional studies of ECMF (Pardo *et al.* 2011; Jarvis *et al.* 2013; Suz *et al.*  
330 2014; Batstone *et al.* 2017), including a recent continental-scale analysis of ECMF community  
331 composition across western Europe (van der Linde *et al.* 2018). By contrast, we found that once  
332 the effects of climate gradients were taken into account, our multiple regression models fit small  
333 and statistically insignificant responses of ECMF diversity to total N deposition (Figure S6).  
334 While we acknowledge that there are many potential drivers of ECMF community structure, our  
335 study design, which focuses exclusively on ECMF in Pinaceae dominated forest stands, allowed



336 us to isolate the large and regionally divergent responses of ECMF communities to spatial-  
337 temporal climate gradients.

338         The most diverse EMCF forests in our network had highly seasonal temperature and  
339 precipitation. Seasonal forests are also associated with ephemeral flushes of nutrients (Voříšková  
340 *et al.* 2014), which ECMF can rapidly absorb, store in networks of soil mycelia, and transfer to  
341 tree hosts at later times (Read 1991). The higher predicted ECMF diversity associated with  
342 seasonality in precipitation mirror results from experimental manipulations on fungal  
343 communities (Hawkes *et al.* 2011) and suggests ECMF diversity may be associated with a  
344 storage effect of seasonal specialists (Chesson 2000).

345         The regionally opposite effects of temperature gradients we observed for ECMF diversity  
346 and composition are consistent with regionally opposite effects of climate on host-tree  
347 physiology. We found that ECMF diversity and long-distance forager abundance decline with  
348 increasing mean temperatures in sites from northern and northwest mountain forests, but increase  
349 with temperature in sites from eastern temperate forests. As a result, our models predict that  
350 ECMF diversity and long-distance forager abundance will decrease in sites along the temperate-  
351 boreal ecotone, but increase in eastern temperate forests. Warming of boreal tree species growing  
352 near the boreal-temperate ecotone has also been shown to reduce tree growth and photosynthetic  
353 rate (Reich & Oleksyn 2008; Reich *et al.* 2015; Fernandez *et al.* 2017), which causes trees to  
354 allocate less C to ECMF (Fernandez *et al.* 2017). By contrast, stimulated warming does not result  
355 in declines in photosynthetic rates for temperate tree species, which are adapted to warmer  
356 climates, or in boreal tree species growing at their colder, northern range limits (Reich &  
357 Oleksyn 2008). Thus, the qualitatively different effects of climate we detected on ECMF species  
358 richness and composition could reflect the climate-envelopes of their associated host trees, with

359 projected declines in species richness occurring only in regions where ECMF host tree  
360 performance declines with increasing temperature.

361         Additionally, adaptation of ECMF species to different climate envelopes can explain  
362 qualitatively different community responses to temperature and precipitation (Lehto *et al.* 2008;  
363 Malcolm *et al.* 2009) (Hawkes & Keitt 2015). ECMF communities associated with different sites  
364 have completely separate species compositions (mean dissimilarity of 0.97 out of 1, 42% species  
365 endemic to a single site), which is consistent with the generally high spatial turnover among soil  
366 fungal communities (Talbot *et al.* 2014). The most dissimilar ECMF communities also have the  
367 most contrasting climates (e.g., northern forests with hot summers and cold winters vs. pacific  
368 coastal and southeastern temperate forests that lack seasonality, Figure 2c), such that different  
369 ECMF species are associated with the cold- and hot- diversity optima. Similarly, threshold  
370 indicator taxa analysis along mean annual temperature gradients identify ECMF community  
371 thresholds at  $\sim 3^{\circ}\text{C}$  (Figure 3b), such that a host of cold-adapted ECMF species should decline  
372 with increasing temperature (Figure 3a). However, whereas small-scale studies of stimulated  
373 warming generally find low or absent effects on ECMF diversity (Parrent *et al.* 2006; Tu *et al.*  
374 2015; Fernandez *et al.* 2017; Mucha *et al.* 2018), our models predict that addition to EMCF  
375 compositional changes, larger scale climate alteration will result in substantial diversity losses  
376 and gains across North America.

377         The magnitude of ECMF species losses and gains are contingent on the decisions of  
378 human policymakers, though even with mitigation of greenhouse gas emissions the outcomes are  
379 not qualitatively different. If greenhouse gas emissions are capped by 2040, median loss of  
380 species richness and the geographic extent of those declines shrink from 21 to 14% and from 48  
381 to 44% of pine forests, respectively. Conversely, the predicted increase in ECMF diversity and

382 abundance have the potential to increase C sequestration and retention in both far northern and  
383 south/southeastern forests. These increases are also more extensive and intense with higher  
384 greenhouse-gas emissions (Figures 1b, 3,4). However, while ECMF differ in foraging and  
385 dispersal strategy and enzymatic abilities, which can lead to positive diversity-seedling growth  
386 relationship from a range of 1-4 ECMF species in experimental tree seedlings (Baxter & Dighton  
387 2001, 2005), it remains unclear how a system with ~100 ECMF species will respond to a loss or  
388 gain of 25-30%. Despite uncertainty of the magnitude of this effect, recent work suggests that  
389 species loss results in declines in ecosystem productivity and resiliency across a broad range of  
390 taxa (Duffy *et al.* 2017), including plant-microbial symbionts (Laforest-Lapointe *et al.* 2017).

391         The most likely functional fallouts for forest ecosystems predicted to lose ECMF  
392 diversity, such as northern and northwest mountain forests, are decreased C sequestration (via  
393 declining productivity (Terrer *et al.* 2016)) and decreased C-retention (via relaxed inhibition of  
394 free-living microbes (Averill & Hawkes 2016)). Two lines of evidence from our data support this  
395 functional shift: (1) forests projected to lose ECMF species in altered climates are also projected  
396 to decline in the relative abundance of C-demanding, long- and medium-distance exploration  
397 strategies (Figure 5abc); and (2) sites with higher ECMF species richness have higher activity of  
398 oxidative enzymes associated with N mineralization and the slow-decomposition of soil C  
399 (Figure 6). Thus, the loss of long- and medium-distance foraging strategies could result in less  
400 fixed-C being sequestered below-ground, while decreased enzymatic function associated with  
401 declines in ECMF diversity could compromise the ECMF-associated C-fertilization and Gadgil  
402 effects in altered climates (Averill *et al.* 2014; Averill & Hawkes 2016).

403         Forecasting continental changes in ECMF communities is a first-step in projecting the  
404 functional consequences of those changes. In summary, over the next 50 years we predict climate

405 change will cause ECMF species richness to contract by 16-22% in north/northwestern pine  
406 forests of North America and expand by 21-28% in south/southeast pine forests. These changes  
407 have the potential to expand and contract the role ECMF play as boosters of forest productivity  
408 and inhibitors of soil respiration by free-living microbes.

409 **Conflict of Interest**

410 The authors declare that they have no conflict of interest.

411 **Data Availability**

412 Upon acceptance for publication, data will be archived in Dryad.

413

414

415 **Tables**

416 **Table 1. Current summary statistics for (a) ECMF species richness, (b) relative abundance,**  
 417 **and (c) Bray-Curtis dissimilarity, along with significance of climate variables in general-**  
 418 **additive models [(k)nots=4] for (a) and (b) and a summary of the general-dissimilarity**  
 419 **model for (c, k=3).**

| <b>(a) species richness (mean = 97.4, median = 98.5, iqr = 59.5)</b>         |                                          |               |                |                |
|------------------------------------------------------------------------------|------------------------------------------|---------------|----------------|----------------|
| <u>climate variable</u>                                                      | <u>Estimated degrees of freedom (df)</u> | <u>Ref.df</u> | <u>F-value</u> | <u>p-value</u> |
| Mean annual temperature                                                      | 2.89                                     | 2.98          | 9.98           | <0.001 ***     |
| Temperature seasonality                                                      | 2.59                                     | 2.89          | 10.64          | <0.001***      |
| Mean annual precipitation                                                    | 2.15                                     | 2.54          | 5.45           | 0.01**         |
| Precipitation seasonality                                                    | 3.00                                     | 3.00          | 7.59           | <0.001***      |
| Deviance explained = 58.3%; GCV = 845.43; Scale est. = 700.78                |                                          |               |                |                |
| <b>(b) relative abundance (mean = 0.48, median = 0.52, iqr = 0.17)</b>       |                                          |               |                |                |
| Mean annual temperature                                                      | 1.75                                     | 2.07          | 11.23          | 0.07 .         |
| Temperature seasonality                                                      | 2.48                                     | 2.80          | 13.54          | <0.001***      |
| Mean annual precipitation                                                    | 1.75                                     | 2.07          | 11.23          | <0.001***      |
| Precipitation seasonality                                                    | 2.81                                     | 2.96          | 4.52           | <.01**         |
| Deviance explained = 54.3%, GCV = 0.014, Scale est. = 0.012                  |                                          |               |                |                |
| <b>(c) Bray-Curtis dissimilarity (mean = 0.94, median = 0.97, iqr= 0.07)</b> |                                          |               |                |                |
| Null Deviance = 154. 11; GDM Deviance = 90.6; Deviance explained = 41.2%     |                                          |               |                |                |

420

421

422 **Figures**

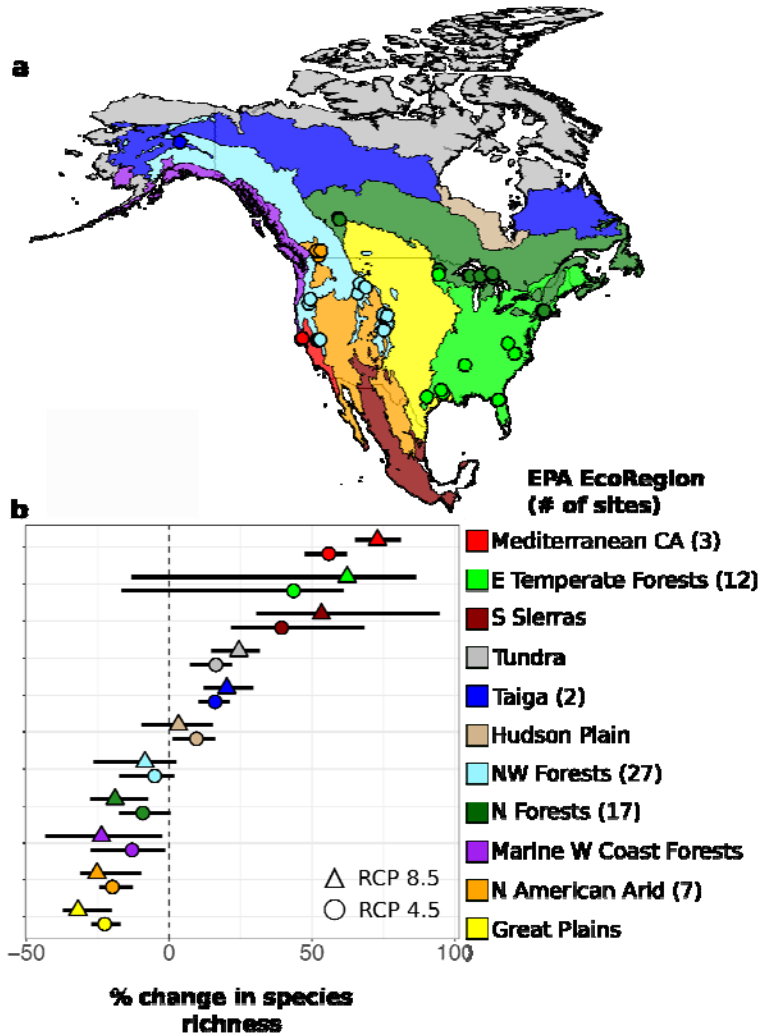

423

424 **Figure 1. The predicted change in ECMF species richness by 2070 under two estimates of**

425 **greenhouse gas emissions. (a) A map of North America shaded by EPA EcoRegion, with**

426 **sites indicated by points. (b) Median predicted change in species richness by EcoRegion**

427 **with error bars containing the inter-quartile range for RCP 8.5.**

428

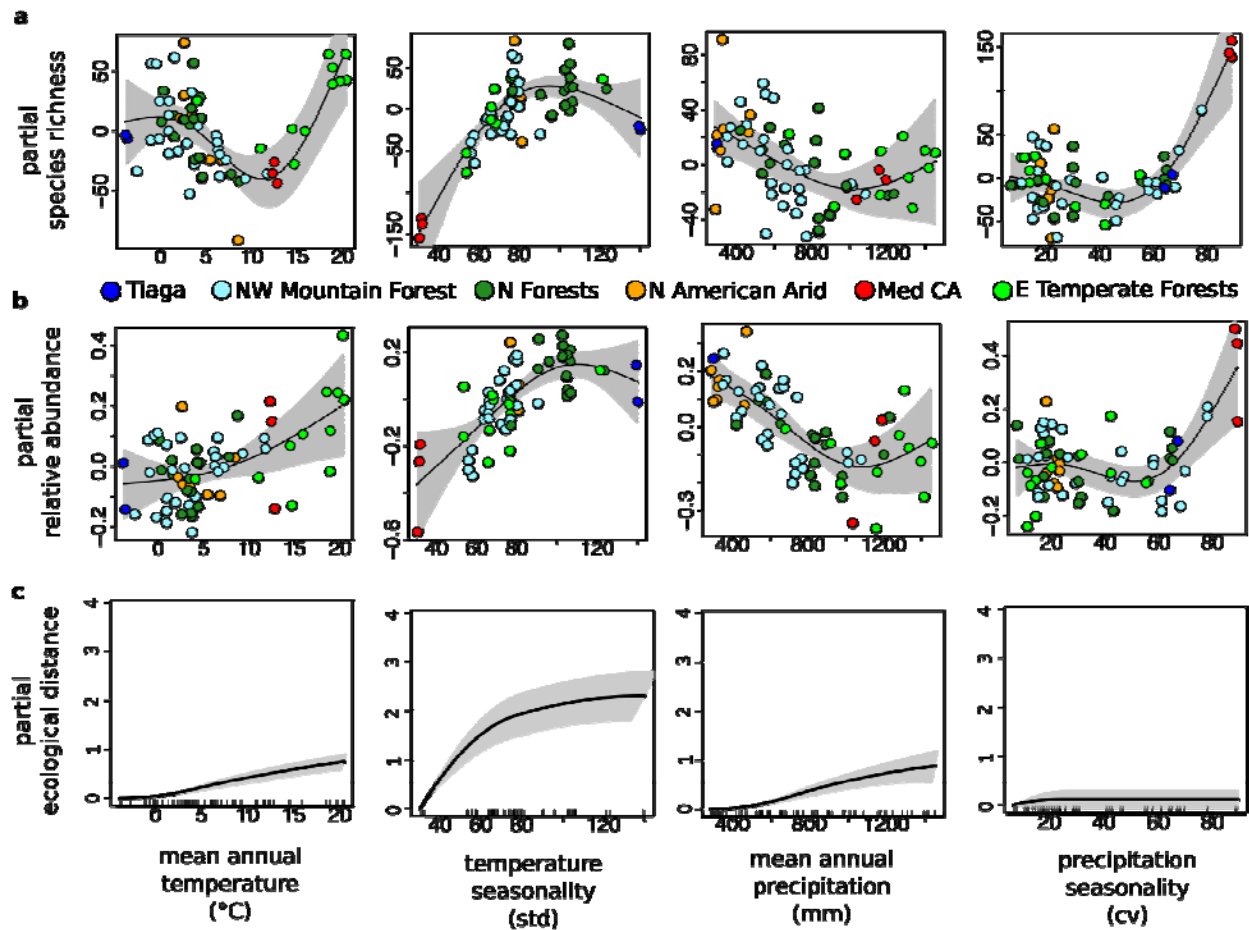

429

430 **Figure 2. The predictions of partial regression and best-fit splines for general-additive**

431 **models for species richness (a) and relative abundance (b) by historical (1960-1990)**

432 **climate, with shading along the 95% confidence interval. Total species richness and relative**

433 **abundance for each site are equal to the sum of the four predictions and an intercept value**

434 **(97.04 and 0.48 for species richness and relative abundance, respectively). Points are**

435 **colored according to EPA EcoRegion as in Figure 1. (c) The expected difference in ECMF**

436 **community composition, measured as the partial ecological distance, among sites according**

437 **to generalized dissimilarity models, with lines on the x-axis indicated empirical values,**

438 **while shading represents the 95% confidence interval after sampling 70% of sites 10 times.**

439

440

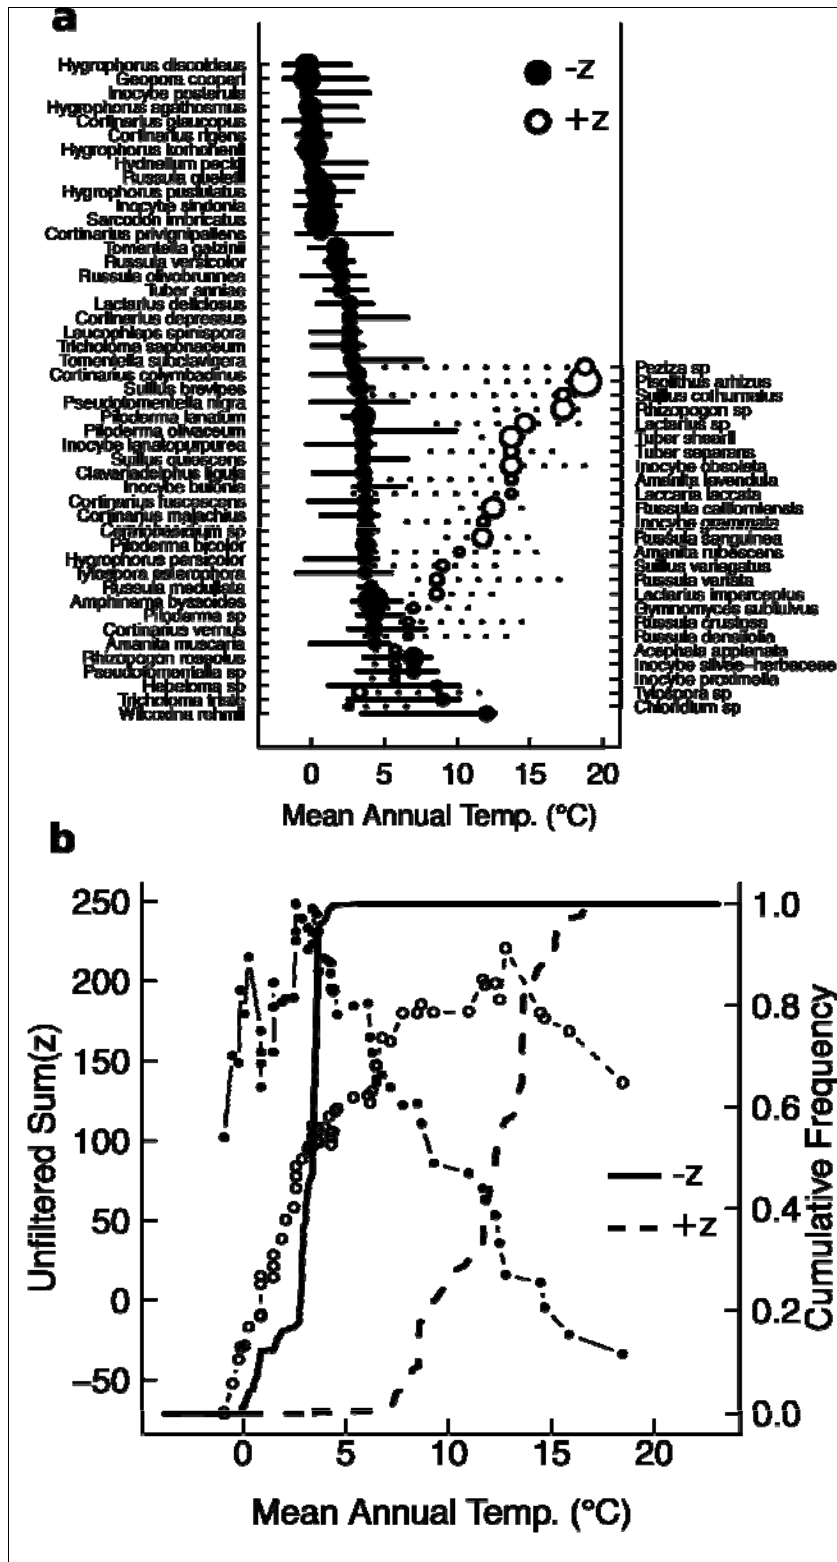

Figure 3. (a) The change points (circles) and 95% confidence intervals for ECMF species with negative and positive responses to increasing mean annual temperature (-z and +z, respectively). (b) The sum of z-scores (lines with points, left axis) and cumulative distribution of change points (right axis) for ECMF species with negative and positive z-scores. Peaks in the unfiltered sum(z) and sharp increases in cumulative frequency indicate ECMF community thresholds for change along mean annual temperature gradients.

441



442

443

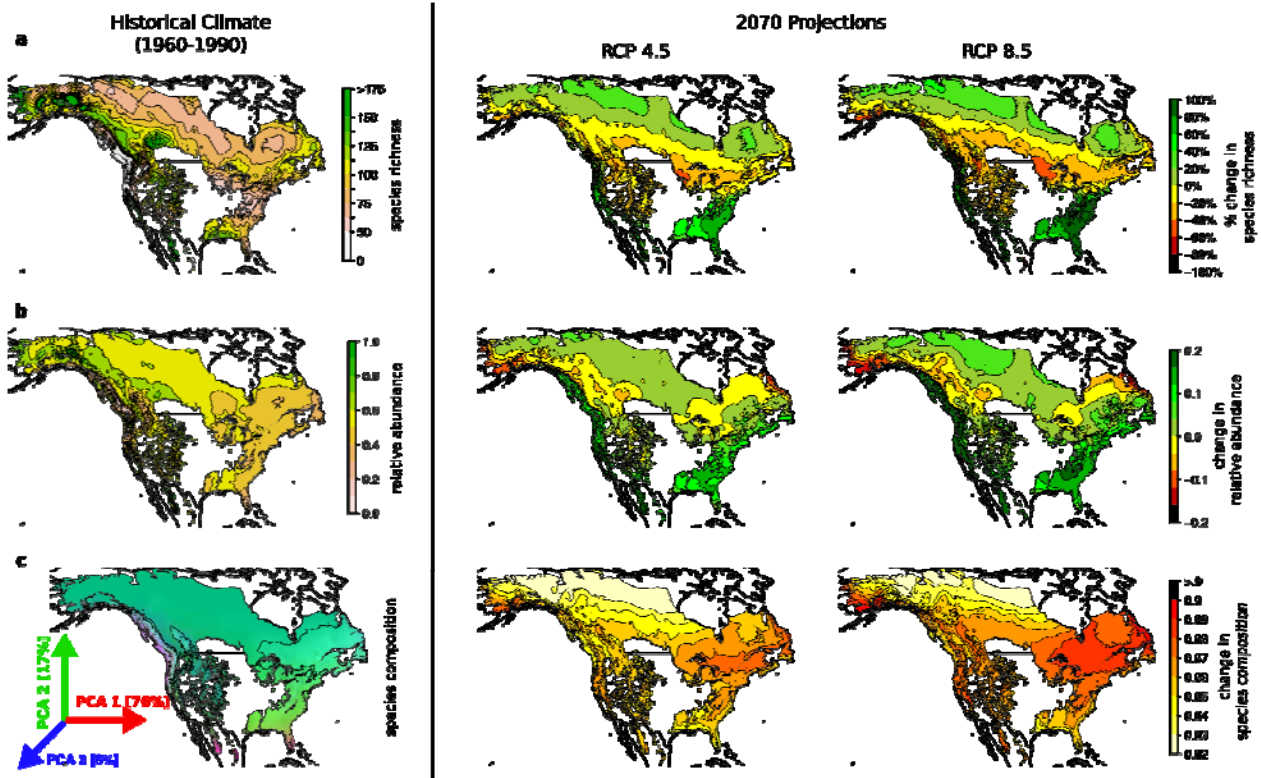

444

445 **Figure 4. Predicted maps (right) using historical climate and general-additive models for**  
446 **(a) species richness, (b) relative abundance and the (c) first three PCA axes indicated by**  
447 **green, red, and blue color scaling using a general dissimilarity model for species**  
448 **composition [with % of predicted variance explained]. Contour lines for species**  
449 **composition (c) delineate four clusters in the three dimensional PCA space. The projected**  
450 **changes for 2070 under different RCP scenarios are plotted to the left. Regions of high**  
451 **ECMF predicted species richness (a) at the temperate-boreal ecotone and throughout**  
452 **northwest mountain and marine west coast forests are particularly vulnerable to species**  
453 **loss, while eastern temperate forests are expected to increase to species richness.**

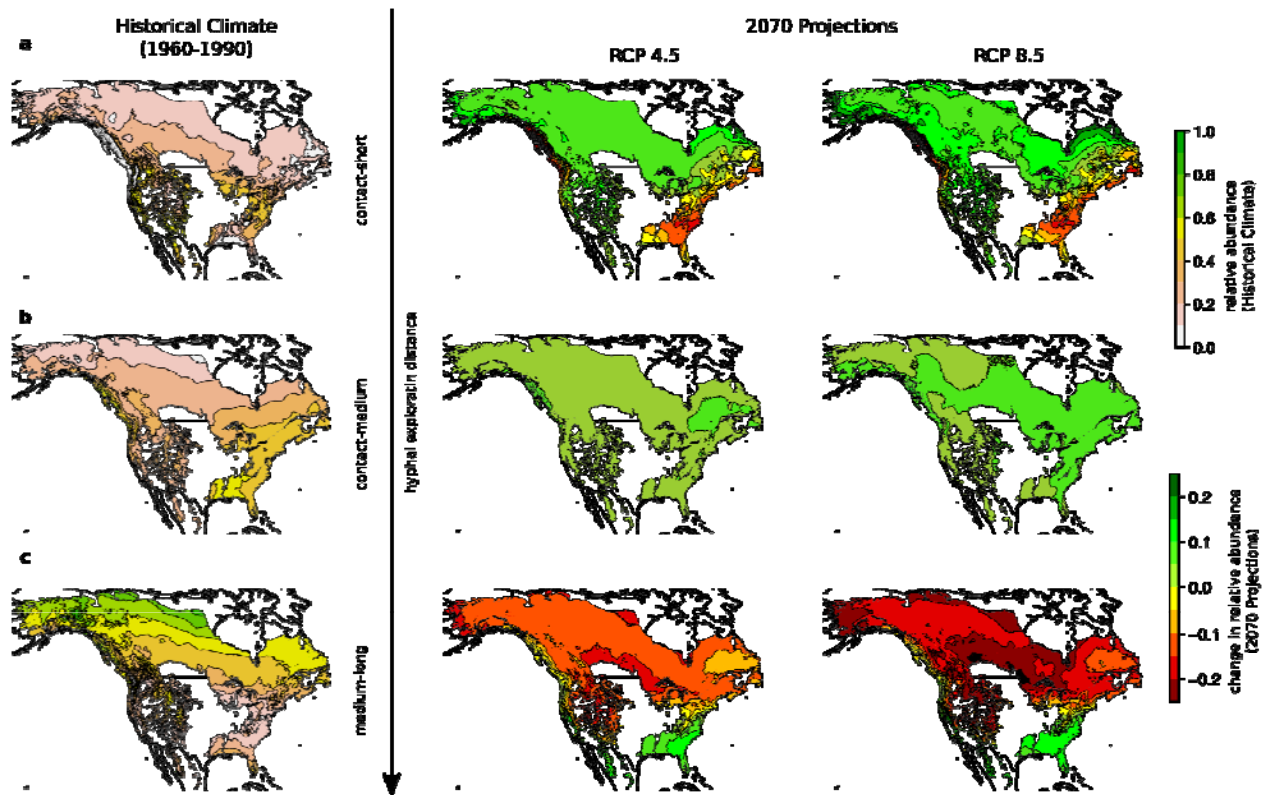

454  
455 **Figure 5. Predicted relative abundance (% of ECMF sequences) of (a) contact-short, (b)**  
456 **contact-medium, and (c) medium long hyphal exploration strategies under historical**  
457 **climates (right, top key) and projected changes in relative abundance under two different C**  
458 **emissions scenarios for 2070 (left, bottom key). Contact-short strategies increase sharply in**  
459 **northern / northwest forests and decrease in southeast temperate forests. Medium-long**  
460 **strategies have the opposite pattern.**

461

462

463

464

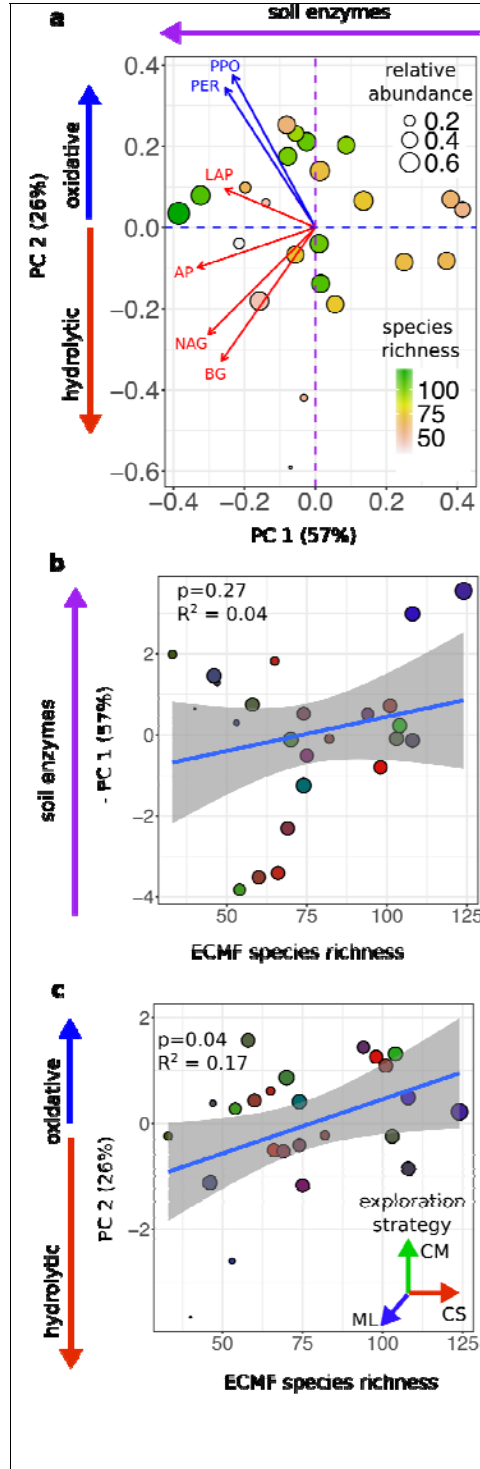

**Figure 6. (a)** Plot of forest sites against the first two axes of principal component analysis for log-transformed enzyme activity. Blue vector indicate the loading values of oxidative enzymes (PPO; PER, peroxidase), while red vectors indicate loading values of hydrolytic enzymes (LAP, leucin-aminopeptidase; AP, acid phosphatase; NAG, N-acetylgulocsaminiidase; BG, B-glucosidase). All enzymes load negatively onto PC 1, while PC 2 discriminates between oxidative and hydrolytic enzyme activity. (b) and (c) show the correlation between ECMF species richness and -PC 1 (not-significant) and PC 2 (significant). All points are sized according to the relative abundance of ECMF relative to all fungi (legend in panel a), while points in (b) and (c) are colored using 3D color scaling of the relative abundance of different hyphal exploration strategies (CS, contact-short; CM, contact-medium; ML, medium-long).

465

466

467 **References**

468 1.

469 Agerer, R. (2001). Exploration types of ectomycorrhizae. *Mycorrhiza*, 11, 107-114.

470 2.

471 Agerer, R. (2006). Fungal relationships and structural identity of their ectomycorrhizae.

472 *Mycological Progress*, 5, 67-107.

473 3.

474 Allen, M.R., Barros, V.R., Broome, J., Cramer, W., Christ, R., Church, J.A. *et al.* (2014). IPCC

475 fifth assessment synthesis report-climate change 2014 synthesis report.

476 4.

477 Averill, C. & Hawkes, C.V. (2016). Ectomycorrhizal fungi slow soil carbon cycling. *Ecol Lett*,

478 19, 937-947.

479 5.

480 Averill, C., Turner, B.L. & Finzi, A.C. (2014). Mycorrhiza-mediated competition between

481 plants and decomposers drives soil carbon storage. *Nature*, 505, 543-+.

482 6.

483 Baker, M.E. & King, R.S. (2010). A new method for detecting and interpreting biodiversity

484 and ecological community thresholds. *Methods in Ecology and Evolution*, 1, 25-37.

485 7.

486 Batstone, R.T., Dutton, E.M., Wang, D.L., Yang, M. & Frederickson, M.E. (2017). The evolution

487 of symbiont preference traits in the model legume *Medicago truncatula*. *New Phytol.*,

488 213, 1850-1861.

489 8.

490 Baxter, J.W. & Dighton, J. (2001). Ectomycorrhizal diversity alters growth and nutrient

491 acquisition of grey birch (*Betula populifolia*) seedlings in host-symbiont culture

492 conditions. *New Phytol.*, 152, 139-149.

493 9.

494 Baxter, J.W. & Dighton, J. (2005). Phosphorus source alters host plant response to

495 ectomycorrhizal diversity. *Mycorrhiza*, 15, 513-523.

496 10.

497 Bissett, A., Brown, M.V., Siciliano, S.D. & Thrall, P.H. (2013). Microbial community responses

498 to anthropogenically induced environmental change: towards a systems approach.

499 *Ecol Lett*, 16, 128-139.

500 11.

- 501 Bolger, A.M., Lohse, M. & Usadel, B. (2014). Trimmomatic: a flexible trimmer for Illumina  
502 sequence data. *Bioinformatics*, 30, 2114-2120.  
503 12.
- 504 Caporaso, J.G., Kuczynski, J., Stombaugh, J., Bittinger, K., Bushman, F.D., Costello, E.K. *et al.*  
505 (2010). QIIME allows analysis of high-throughput community sequencing data. *Nat*  
506 *Methods*, 7, 335-336.  
507 13.
- 508 Carlsen, T., Aas, A.B., Lindner, D., Vralstad, T., Schumacher, T. & Kauserud, H. (2012). Don't  
509 make a mista(g)ke: is tag switching an overlooked source of error in amplicon  
510 pyrosequencing studies? *Fungal Ecol*, 5, 747-749.  
511 14.
- 512 Chesson, P. (2000). Mechanisms of maintenance of species diversity. *Annu Rev Ecol Syst*, 31,  
513 343-366.  
514 15.
- 515 Deshpande, V., Wang, Q., Greenfield, P., Charleston, M., Porras-Alfaro, A., Kuske, C.R. *et al.*  
516 (2016). Fungal identification using a Bayesian classifier and the Warcup training set  
517 of internal transcribed spacer sequences. *Mycologia*, 108, 1-5.  
518 16.
- 519 Deslippe, J., Hartmann, M., Mohn, W. & Simard, S. (2011). Long-term experimental  
520 manipulation of climate alters the ectomycorrhizal community of *Betula nana* in  
521 Arctic tundra. *Global Change Biol*, 17, 1625-1636.  
522 17.
- 523 Duffy, J.E., Godwin, C.M. & Cardinale, B.J. (2017). Biodiversity effects in the wild are  
524 common and as strong as key drivers of productivity. *Nature*, advance online  
525 publication.  
526 18.
- 527 Edgar, R.C. (2010). Search and clustering orders of magnitude faster than BLAST.  
528 *Bioinformatics*, 26, 2460-2461.  
529 19.
- 530 Fernandez, C.W., Nguyen, N.H., Stefanski, A., Han, Y., Hobbie, S.E., Montgomery, R.A. *et al.*  
531 (2017). Ectomycorrhizal fungal response to warming is linked to poor host  
532 performance at the boreal-temperate ecotone. *Global Change Biol*, 23, 1598-1609.  
533 20.
- 534 Fierer, N., Leff, J.W., Adams, B.J., Nielsen, U.N., Bates, S.T., Lauber, C.L. *et al.* (2012). Cross-  
535 biome metagenomic analyses of soil microbial communities and their functional  
536 attributes. *Proceedings of the National Academy of Sciences of the United States of*  
537 *America*, 109, 21390-21395.  
538 21.

- 539 Gadgil, R.L. & Gadgil, P. (1971). Mycorrhiza and litter decomposition. *Nature*, 233, 133.  
540 22.
- 541 German, D.P., Weintraub, M.N., Grandy, A.S., Lauber, C.L., Rinkes, Z.L. & Allison, S.D. (2011).  
542 Optimization of hydrolytic and oxidative enzyme methods for ecosystem studies.  
543 *Soil Biology and Biochemistry*, 43, 1387-1397.  
544 23.
- 545 Hawkes, C.V. & Keitt, T.H. (2015). Resilience vs. historical contingency in microbial  
546 responses to environmental change. *Ecol Lett*, 18, 612-625.  
547 24.
- 548 Hawkes, C.V., Kivlin, S.N., Rocca, J.D., Huguet, V., Thomsen, M.A. & Suttle, K.B. (2011). Fungal  
549 community responses to precipitation. *Global Change Biol*, 17, 1637-1645.  
550 25.
- 551 Hawkes, C.V., Waring, B.G., Rocca, J.D. & Kivlin, S.N. (2017). Historical climate controls soil  
552 respiration responses to current soil moisture. *Proceedings of the National Academy  
553 of Sciences of the United States of America*, 114, 6322-6327.  
554 26.
- 555 Hember, R.A. (2018). Spatially and temporally continuous estimates of annual total  
556 nitrogen deposition over North America, 1860–2013. *Data in brief*.  
557 27.
- 558 Hengl, T., de Jesus, J.M., Heuvelink, G.B., Gonzalez, M.R., Kilibarda, M., Blagotić, A. *et al.*  
559 (2017). SoilGrids250m: Global gridded soil information based on machine learning.  
560 *PLoS one*, 12, e0169748.  
561 28.
- 562 Hijmans, R.J., Cameron, S.E., Parra, J.L., Jones, P.G. & Jarvis, A. (2005). Very high resolution  
563 interpolated climate surfaces for global land areas. *Int J Climatol*, 25, 1965-1978.  
564 29.
- 565 Hijmans, R.J. & Graham, C.H. (2006). The ability of climate envelope models to predict the  
566 effect of climate change on species distributions. *Global Change Biol*, 12, 2272-2281.  
567 30.
- 568 Hobbie, E.A. & Agerer, R. (2010). Nitrogen isotopes in ectomycorrhizal sporocarps  
569 correspond to belowground exploration types. *Plant and Soil*, 327, 71-83.  
570 31.
- 571 Ishida, T.A., Nara, K. & Hogetsu, T. (2007). Host effects on ectomycorrhizal fungal  
572 communities: insight from eight host species in mixed conifer-broadleaf forests.  
573 *New Phytologist*, 174, 430-440.  
574 32.

- 575 Jarvis, S., Woodward, S., Alexander, I. & Taylor, A. (2013). Regional scale gradients of  
576 climate and nitrogen deposition drive variation in ectomycorrhizal fungal  
577 communities associated with native Scots pine. *Global Change Biol*, 19, 1688-1696.  
578 33.
- 579 Karhu, K., Auffret, M.D., Dungait, J.A.J., Hopkins, D.W., Prosser, J.I., Singh, B.K. *et al.* (2014).  
580 Temperature sensitivity of soil respiration rates enhanced by microbial community  
581 response. *Nature*, 513, 81-+.  
582 34.
- 583 Kennedy, P.G., Izzo, A.D. & Bruns, T.D. (2003). There is high potential for the formation of  
584 common mycorrhizal networks between understorey and canopy trees in a mixed  
585 evergreen forest. *Journal of Ecology*, 91, 1071-1080.  
586 35.
- 587 Kipfer, T., Egli, S., Ghazoul, J., Moser, B. & Wohlgemuth, T. (2010). Susceptibility of  
588 ectomycorrhizal fungi to soil heating. *Fungal biology*, 114, 467-472.  
589 36.
- 590 Koide, R.T., Fernandez, C. & Malcolm, G. (2014). Determining place and process: functional  
591 traits of ectomycorrhizal fungi that affect both community structure and ecosystem  
592 function. *New Phytol.*, 201, 433-439.  
593 37.
- 594 Koljalg, U., Nilsson, R.H., Abarenkov, K., Tedersoo, L., Taylor, A.F.S., Bahram, M. *et al.* (2013).  
595 Towards a unified paradigm for sequence-based identification of fungi. *Mol Ecol*, 22,  
596 5271-5277.  
597 38.
- 598 Laforest-Lapointe, I., Paquette, A., Messier, C. & Kembel, S.W. (2017). Leaf bacterial  
599 diversity mediates plant diversity and ecosystem function relationships. *Nature*,  
600 546, 145-+.  
601 39.
- 602 Lehto, T., Brosinsky, A., Heinonen-Tanski, H. & Repo, T. (2008). Freezing tolerance of  
603 ectomycorrhizal fungi in pure culture. *Mycorrhiza*, 18, 385-392.  
604 40.
- 605 Malcolm, G.M., Lopez-Gutierrez, J.C., Koide, R.T. & Eissenstat, D.M. (2009). Acclimation to  
606 temperature and temperature sensitivity of metabolism by ectomycorrhizal fungi  
607 (vol 14, pg 1169, 2008). *Global Change Biol*, 15, 2333-2333.  
608 41.
- 609 Manion, G., Lisk, M., Ferrier, S., Nieto-Lugilde, D. & Fitzpatrick, M. *gdm: Functions for*  
610 *Generalized Dissimilarity Modeling*. R package version 1.2. 3. 2016.  
611 42.

- 612 Martin, M. (2011). Cutadapt removes adapter sequences from high-throughput sequencing  
613 reads. *EMBnet. journal*, 17, pp. 10-12.  
614 43.
- 615 Mohan, J.E., Cowden, C.C., Baas, P., Dawadi, A., Frankson, P.T., Helmick, K. *et al.* (2014).  
616 Mycorrhizal fungi mediation of terrestrial ecosystem responses to global change:  
617 mini-review. *Fungal Ecol*, 10, 3-19.  
618 44.
- 619 Mucha, J., Peay, K.G., Smith, D.P., Reich, P.B., Stefanski, A. & Hobbie, S.E. (2018). Effect of  
620 Simulated Climate Warming on the Ectomycorrhizal Fungal Community of Boreal  
621 and Temperate Host Species Growing Near Their Shared Ecotonal Range Limits.  
622 *Microb Ecol*, 75, 348-363.  
623 45.
- 624 Nguyen, N.H., Song, Z.W., Bates, S.T., Branco, S., Tedersoo, L., Menke, J. *et al.* (2016).  
625 FUNGuild: An open annotation tool for parsing fungal community datasets by  
626 ecological guild. *Fungal Ecol*, 20, 241-248.  
627 46.
- 628 Nilsson, R.H., Veldre, V., Hartmann, M., Unterseher, M., Amend, A., Bergsten, J. *et al.* (2010).  
629 An open source software package for automated extraction of ITS1 and ITS2 from  
630 fungal ITS sequences for use in high-throughput community assays and molecular  
631 ecology. *Fungal Ecol*, 3, 284-287.  
632 47.
- 633 Nottingham, A., Fierer, N., Turner, B., Whitaker, J., Ostle, N., McNamara, N. *et al.* (2016).  
634 Temperature drives plant and soil microbial diversity patterns across an elevation  
635 gradient from the Andes to the Amazon. *bioRxiv*, 079996.  
636 48.
- 637 Omernik, J.M. & Griffith, G.E. (2014). Ecoregions of the Conterminous United States:  
638 Evolution of a Hierarchical Spatial Framework. *Environ Manage*, 54, 1249-1266.  
639 49.
- 640 Pardo, L.H., Fenn, M.E., Goodale, C.L., Geiser, L.H., Driscoll, C.T., Allen, E.B. *et al.* (2011).  
641 Effects of nitrogen deposition and empirical nitrogen critical loads for ecoregions of  
642 the United States. *Ecological Applications*, 21, 3049-3082.  
643 50.
- 644 Parrent, J.L., Morris, W.F. & Vilgalys, R. (2006). CO<sub>2</sub>-enrichment and nutrient availability  
645 alter ectomycorrhizal fungal communities. *Ecology*, 87, 2278-2287.  
646 51.
- 647 Peay, K.G., von Sperber, C., Cardarelli, E., Toju, H., Francis, C.A., Chadwick, O.A. *et al.* (2017).  
648 Convergence and contrast in the community structure of Bacteria, Fungi and  
649 Archaea along a tropical elevation-climate gradient. *Fems Microbiol Ecol*, 93.  
650 52.



- 651 Phillips, R.P., Brzostek, E. & Midgley, M.G. (2013). The mycorrhizal-associated nutrient  
652 economy: a new framework for predicting carbon-nutrient couplings in temperate  
653 forests. *New Phytol.*, 199, 41-51.  
654 53.
- 655 Pickles, B.J., Egger, K.N., Massicotte, H.B. & Green, D.S. (2012). Ectomycorrhizas and climate  
656 change. *Fungal Ecol*, 5, 73-84.  
657 54.
- 658 Pierce, D.W., Barnett, T.P., Santer, B.D. & Gleckler, P.J. (2009). Selecting global climate  
659 models for regional climate change studies. *Proceedings of the National Academy of  
660 Sciences of the United States of America*, 106, 8441-8446.  
661 55.
- 662 Read, D.J. (1991). Mycorrhizas in Ecosystems. *Experientia*, 47, 376-391.  
663 56.
- 664 Reeder, J. & Knight, R. (2010). Rapidly denoising pyrosequencing amplicon reads by  
665 exploiting rank-abundance distributions. *Nat Methods*, 7, 668-669.  
666 57.
- 667 Reich, P.B. & Oleksyn, J. (2008). Climate warming will reduce growth and survival of Scots  
668 pine except in the far north. *Ecol Lett*, 11, 588-597.  
669 58.
- 670 Reich, P.B., Sendall, K.M., Rice, K., Rich, R.L., Stefanski, A., Hobbie, S.E. *et al.* (2015).  
671 Geographic range predicts photosynthetic and growth response to warming in co-  
672 occurring tree species. *Nature Climate Change*, 5, 148.  
673 59.
- 674 Rusca, T.A., Kennedy, P.G. & Bruns, T.D. (2006). The effect of different pine hosts on the  
675 sampling of *Rhizopogon* spore banks in five Eastern Sierra Nevada forests. *New  
676 Phytol.*, 170, 551-560.  
677 60.
- 678 Schoch, C.L., Seifert, K.A., Huhndorf, S., Robert, V., Spouge, J.L., Levesque, C.A. *et al.* (2012).  
679 Nuclear ribosomal internal transcribed spacer (ITS) region as a universal DNA  
680 barcode marker for Fungi. *Proceedings of the National Academy of Sciences of the  
681 United States of America*, 109, 6241-6246.  
682 61.
- 683 Smith, D.P. & Peay, K.G. (2014). Sequence Depth, Not PCR Replication, Improves Ecological  
684 Inference from Next Generation DNA Sequencing. *Plos One*, 9.  
685 62.
- 686 Suz, L.M., Barsoum, N., Benham, S., Dietrich, H.P., Fetzner, K.D., Fischer, R. *et al.* (2014).  
687 Environmental drivers of ectomycorrhizal communities in Europe's temperate oak  
688 forests. *Mol Ecol*, 23, 5628-5644.

- 689 63.
- 690 Talbot, J.M., Bruns, T.D., Smith, D.P., Branco, S., Glassman, S.I., Erlandson, S. *et al.* (2013).  
691 Independent roles of ectomycorrhizal and saprotrophic communities in soil organic  
692 matter decomposition. *Soil Biol. Biochem.*, 57, 282-291.  
693 64.
- 694 Talbot, J.M., Bruns, T.D., Taylor, J.W., Smith, D.P., Branco, S., Glassman, S.I. *et al.* (2014).  
695 Endemism and functional convergence across the North American soil mycobiome.  
696 *Proceedings of the National Academy of Sciences of the United States of America*, 111,  
697 6341-6346.  
698 65.
- 699 Task, G.S.D. (2000). Global gridded surfaces of selected soil characteristics (IGBP-DIS).  
700 *ORNL DAAC*.  
701 66.
- 702 Tedersoo, L., Bahram, M., Polme, S., Koljalg, U., Yorou, N.S., Wijesundera, R. *et al.* (2014).  
703 Global diversity and geography of soil fungi. *Science*, 346, 1078-+.  
704 67.
- 705 Tedersoo, L., Bahram, M., Toots, M., Diedhiou, A.G., Henkel, T.W., Kjoller, R. *et al.* (2012a).  
706 Towards global patterns in the diversity and community structure of  
707 ectomycorrhizal fungi. *Mol Ecol*, 21, 4160-4170.  
708 68.
- 709 Tedersoo, L., Mohammad, B., Toots, M., Diedhiou, A., Henkel, T., Kjoller, R. *et al.* (2012b). Towards global patterns in the diversity and  
710 community structure of ectomycorrhizal fungi. *Molecular Ecology*, 17, 4160-4170.  
711 69.  
712
- 713 Tedersoo, L., Naadel, T., Bahram, M., Pritsch, K., Buegger, F., Leal, M. *et al.* (2012c).  
714 Enzymatic activities and stable isotope patterns of ectomycorrhizal fungi in relation  
715 to phylogeny and exploration types in an afro-tropical rain forest. *New Phytol.*, 195,  
716 832-843.  
717 70.
- 718 Tedersoo, L. & Smith, M.E. (2013). Lineages of ectomycorrhizal fungi revisited: foraging  
719 strategies and novel lineages revealed by sequences from belowground. *Fungal*  
720 *biology reviews*, 27, 83-99.  
721 71.
- 722 Terrer, C., Vicca, S., Hungate, B.A., Phillips, R.P. & Prentice, I.C. (2016). Mycorrhizal  
723 association as a primary control of the CO<sub>2</sub> fertilization effect. *Science*, 353, 72-74.  
724 72.

- 725 Tu, Q.C., Yuan, M.T., He, Z.L., Deng, Y., Xue, K., Wu, L.Y. *et al.* (2015). Fungal Communities  
726 Respond to Long-Term CO<sub>2</sub> Elevation by Community Reassembly. *Appl Environ*  
727 *Microb*, 81, 2445-2454.  
728 73.
- 729 van der Linde, S., Suz, L.M., Orme, C.D.L., Cox, F., Andreae, H., Asi, E. *et al.* (2018).  
730 Environment and host as large-scale controls of ectomycorrhizal fungi. *Nature*, 1.  
731 74.
- 732 Vellinga, E.C., Wolfe, B.E. & Pringle, A. (2009). Global patterns of ectomycorrhizal  
733 introductions. *New Phytologist*, 181, 960-973.  
734 75.
- 735 Voříšková, J., Brabcová, V., Cajthaml, T. & Baldrian, P. (2014). Seasonal dynamics of fungal  
736 communities in a temperate oak forest soil. *New Phytol.*, 201, 269-278.  
737 76.
- 738 Wang, Q., Garrity, G.M., Tiedje, J.M. & Cole, J.R. (2007). Naive Bayesian classifier for rapid  
739 assignment of rRNA sequences into the new bacterial taxonomy. *Appl Environ*  
740 *Microb*, 73, 5261-5267.
- 741
